# Supplementary material
Source: publisher figshare collection journal article supplement (https://acs.figshare.com/ndownloader/files/21966642)
Supplement: Supplementary file 1 [file 21966642]

# Hierarchical core-shell structure of 2D VS<sub>2</sub>@VC@N-doped carbon sheets decorated by ultrafine Pd nanoparticles: assembled in 3D rosette-like array on carbon fiber microelectrode for electrochemical sensing

Hao Yuan,<sup>†,‡</sup> Jianquan Zhao,<sup>‡,‡</sup> Qijun Wang,<sup>†</sup> Devaraj Manoj,<sup>†</sup> Anshun Zhao,<sup>†</sup> Kai Chi,<sup>†</sup> Jinghua Ren<sup>⊥</sup>

Wenshan He,<sup>⊥</sup> Yan Zhang,<sup>⊥</sup> Yimin Sun,<sup>\*,§</sup> Fei Xiao,<sup>\*,†</sup> Shuai Wang<sup>\*,†</sup>

<sup>†</sup> Key laboratory of Material Chemistry for Energy Conversion and Storage, Ministry of Education, School of Chemistry and Chemical Engineering, Huazhong University of Science & Technology, Wuhan 430074, China

<sup>‡</sup> Analytical and Testing Center, Huazhong University of Science & Technology, Wuhan 430074, China

<sup>§</sup> Hubei Key Laboratory of Plasma Chemistry and Advanced Materials, School of Materials Science and Engineering, Wuhan Institute of Technology, Wuhan 430073, China

<sup>⊥</sup> Union Hospital, Tongji Medical College, Huazhong University of Science & Technology, Wuhan 430022, China

## EXPERIMENTAL SECTION

### Reagents

CFs (diameter ~10 μm and length 2.5 cm) were purchased from Fuel Cell Earth, USA). Sodium orthovanadate (Na<sub>3</sub>VO<sub>4</sub>), thioacetamide (C<sub>2</sub>H<sub>5</sub>NS), potassium tetrachloropalladate (K<sub>2</sub>PdCl<sub>4</sub>), hydrogen peroxide (H<sub>2</sub>O<sub>2</sub>), N-formylmethionyl-leucyl-phenyl-alanine (fLMP, ≥99.5%), catalase (come from bovine liver, Lyophilized, ≥3000 units mg<sup>-1</sup>), uric acid (UA), dopamine hydrochloride (DA, 98%), L-ascorbic acid (AA), tris(hydroxymethyl) aminomethane (Tris, 99.8%), chemotherapeutic agent cisplatin

(DDP) were obtained from Sigma-Aldrich Co., Ltd (USA). Dulbecco's modified eagle's medium (DMEM), fetal bovine serum (FBS), trypsin-EDTA (0.25%) and penicillin-streptomycin were purchased from HyCl one (Waltham, USA). All other chemicals used were of analytical reagent grade. All solutions were prepared using deionized water (resistivity:  $18.25 \Omega \text{ cm}^{-1}$ ). For electrochemical experiments and cell testing, 0.1 M phosphate buffer saline (PBS, pH 7.4) solution consisting of  $\text{KH}_2\text{PO}_4$  and  $\text{K}_2\text{HPO}_4$  was used as the electrolyte.

## Characterizations

SEM and TEM images were obtained on a field-emission SEM instrument (FEI, Nova NanoSEM 450) and TEM instrument (FEI, Tecnai G220). XRD pattern was obtained by diffractometer (X'Pert PRO, Panalytical B.V., Netherlands) using a Cu K $\alpha$  radiation source ( $\lambda=1.5406 \text{ \AA}$ ). XPS was carried out *via* a Kratos-Axis spectrometer with monochromatic Al-K $\alpha$  (1486.71 eV) X-ray radiation. All the electrochemical experiments were performed with a CHI 660E electrochemical workstation (Shanghai CH Instruments Co., China) using a conventional three-electrode system. The working electrode is the nanohybrid microelectrode, the reference electrode is Ag/AgCl electrode, and the counter electrode is a platinum wire. To examine the cells' status, the fluorescence microscope (Olympus BX41F, Japan) equipped with a DP73 camera was adopted under different light wavelength. The software cellSens standard 1.7 (Olympus, Japan) was taken for gaining images.

## Biological Samples

For electrochemical test of live cells, three types of living human breast cells, *i.e.*, human breast epithelial cell HBL-100, and breast cancer cell MCF-7 and MBA-MD-231, were obtained from the American Type Culture Collection (ATCC, Manassas, VA, USA) and used for detecting extracellular release of  $\text{H}_2\text{O}_2$ . The cells were maintained in a culture medium DMEM containing 10% FBS and penicillin (1%), and grown under a humidified atmosphere with 5%  $\text{CO}_2$  at 37 °C and subcultured every 3 days. After the growth of ~80% confluence, the cells were collected by centrifugation and used for the electrochemical experiments. The clinical specimen of human primary breast tumor was received within

two hours after surgery from a 54-year-old female patient with primary breast cancer at Union Hospital of Huazhong University of Science & Technology (HUST). The surgically resected specimen was a breast cancer tissue enclosed within adipose tissue. By carefully dissecting the adipose tissue, the breast cancer tissue was obtained, which was washed with PBS solution for several times and soaked in PBS solution at 37 °C for electrochemical testing.

### Electrochemical Analysis of Live Cells and Clinical Cancer Tissue

For real-time tracking  $\text{H}_2\text{O}_2$  secreted from live cells, the  $\text{VS}_2@\text{VC}@\text{NC-PdNPs/CF}$  microelectrode was carefully placed into the testing well containing live cells and located at the edge of the cells. For *in situ* sensitive monitoring of  $\text{H}_2\text{O}_2$  level in breast cancer tissue, the microelectrode was inserted inside the tissue by a micromanipulator under the microscope. To irritate the live cells to release  $\text{H}_2\text{O}_2$ , 0.05 mM fMLP was added into live cells or a segment of breast cancer tissue by syringe, and the amperometric current density originated from  $\text{H}_2\text{O}_2$  secreted by live cells was recorded.

### Computational Method

All calculations were performed by using DFT integrated in the CASTEP model in Materials Studio of Accelrys Inc. The electron exchange and correlation effects were described by the Perdew-Burke-Ernzerhof (PBE) method along with the generalized gradient approximation (GGA) type exchange correlation function.<sup>[1-3]</sup> Typically, the wave functions at each k-point were expanded with a plane wave basis set and a kinetic cutoff energy up to 400 eV, the k-point mesh was set to  $1 \times 1 \times 1$  and fermi smearing was adopted. The geometries were optimized until the energy was converged to  $2 \times 10^{-6}$  eV/atom while the pseudopotentials and pseudopotential representation was set as ultrasoft and reciprocal space, respectively.

The model of VC,  $\text{VS}_2$  and VC- $\text{VS}_2$  were constructed and sealing the rim of all atoms to form the structures. The lattice detail of VC: lengths (Å):  $a = 2.939592$ ,  $b = 2.939592$ ,  $c = 11.200084$ ; The lattice detail of  $\text{VS}_2$ : lengths (Å):  $a = 14.368629$ ,  $b = 5.808105$ ,  $c = 6.499383$ ; The lattice detail of VC- $\text{VS}_2$  was set as: lengths (Å):  $a = 14.468745$ ,  $b = 5.740783$ ,  $c = 6.58077$ . In all structural optimization calculations,

the positions of all the atoms were allowed to relax.

## REFERENCES

1. Kresse, G.; Joubert, D. *Phys. Rev. B* **1999**, *59*, 1758–1775.
2. Blöchl, P. E. *Phys. Rev. B* **1994**, *50*, 17953–17979.
3. Perdew, J. P.; Burke, K.; Ernzerhof, M. *Phys. Rev. Lett.* **1996**, *77*, 3865–3868.

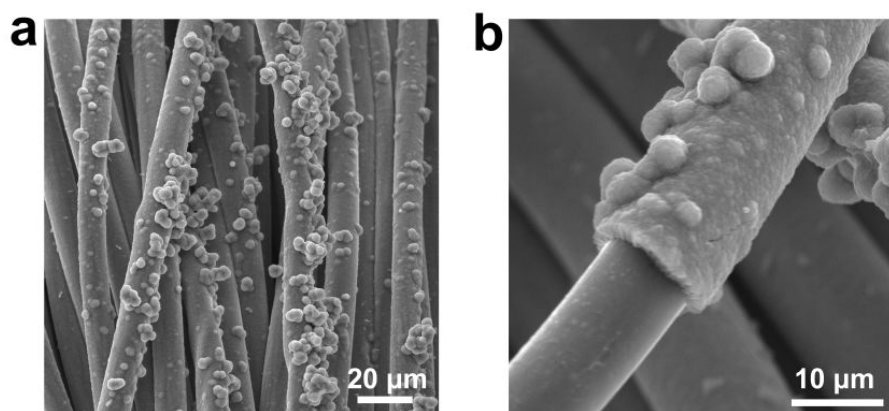

**Figure S1** (a) and (b) SEM images of VS<sub>2</sub>/CF microelectrode under different magnification. VS<sub>2</sub>/CF microelectrode was prepared using VS<sub>2</sub> precursor concentration as low as half of the optimized one.

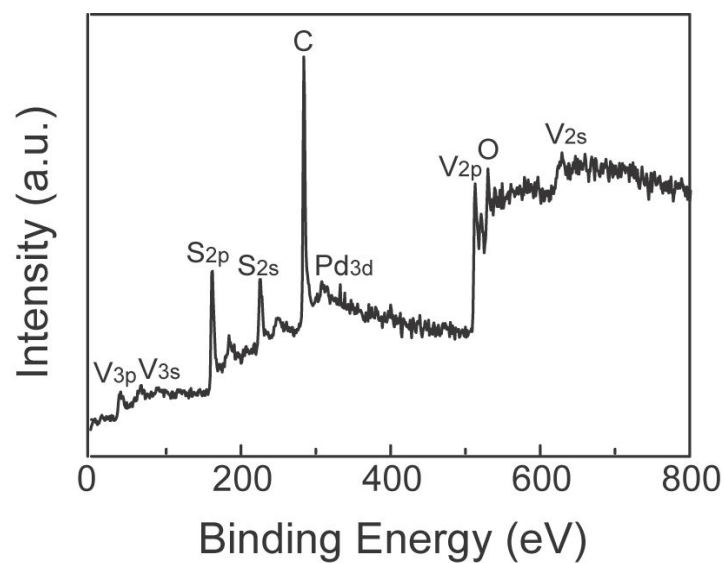

**Figure S2** XPS survey spectrum of VS<sub>2</sub>@VC@NC-PdNPs/CF.

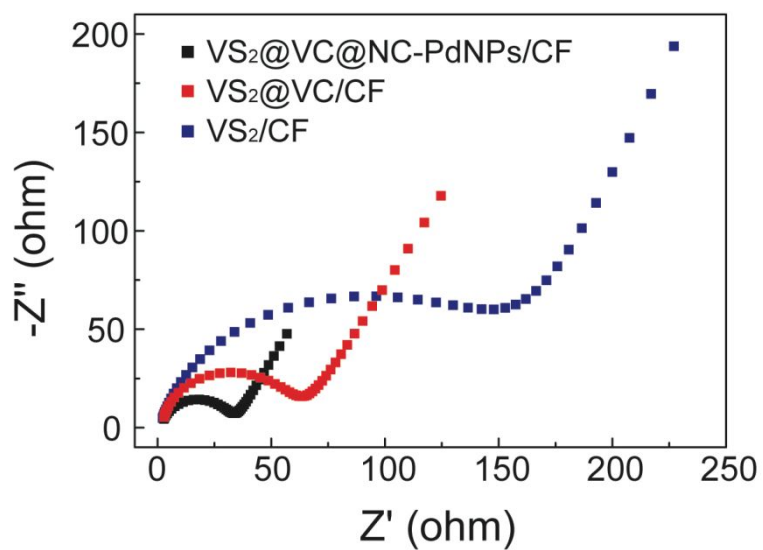

**Figure S3** Nyquist plots of  $\text{VS}_2@\text{VC}@\text{NC-PdNPs/CF}$ ,  $\text{VS}_2@\text{VC/CF}$  and  $\text{VS}_2/\text{CF}$  in 0.1 M KCl solution containing 1.0 mM  $\text{K}_3\text{Fe}(\text{CN})_6$  and 1.0 mM  $\text{K}_4\text{Fe}(\text{CN})_6$ .

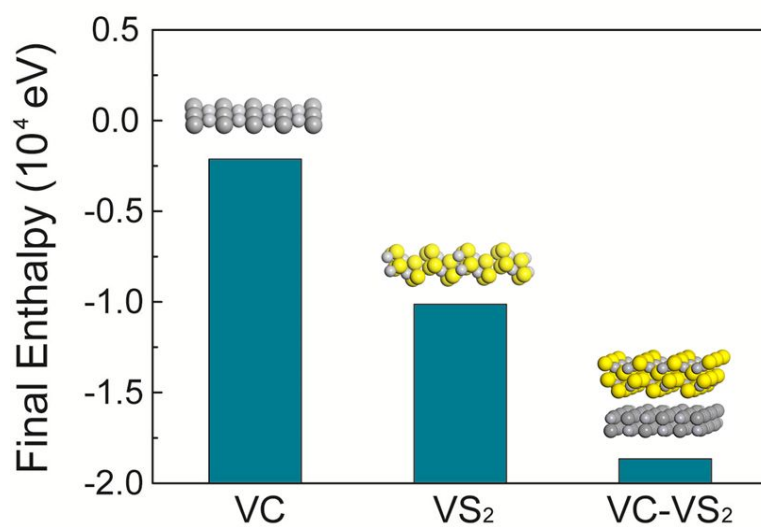

**Figure S4** Inset is the total final enthalpy of VC,  $\text{VS}_2$  and VC- $\text{VS}_2$  species.

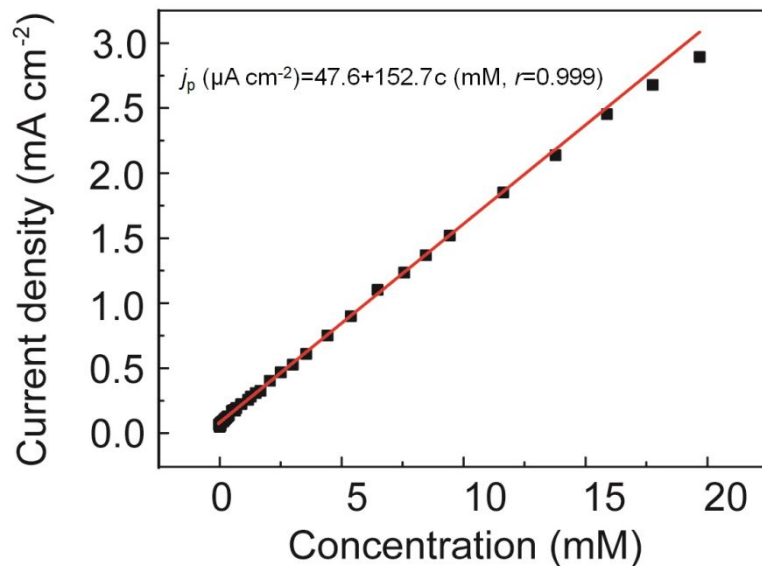

**Figure S5** (a) Calibration plot of the amperometric current-time responses of  $\text{VS}_2@\text{VC}@\text{NC-PdNPs/CF}$  microelectrode to the successive addition of  $\text{H}_2\text{O}_2$  with different concentrations from  $0.1 \mu\text{M}$  to  $20 \text{ mM}$ .

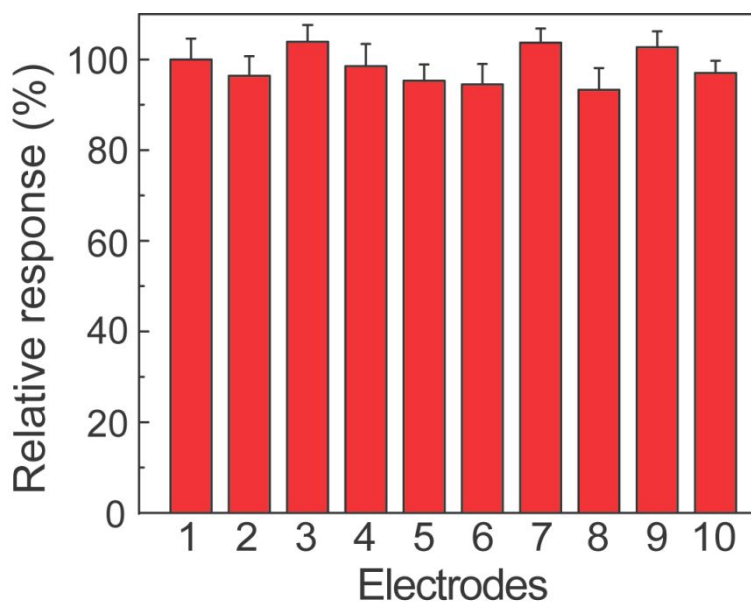

**Figure S6** Relative current response of ten different  $\text{VS}_2@\text{VC}@\text{NC-PdNPs/CF}$  microelectrodes to  $0.1 \text{ mM H}_2\text{O}_2$  in  $0.1 \text{ M PBS}$  solution ( $\text{pH } 7.4$ ).

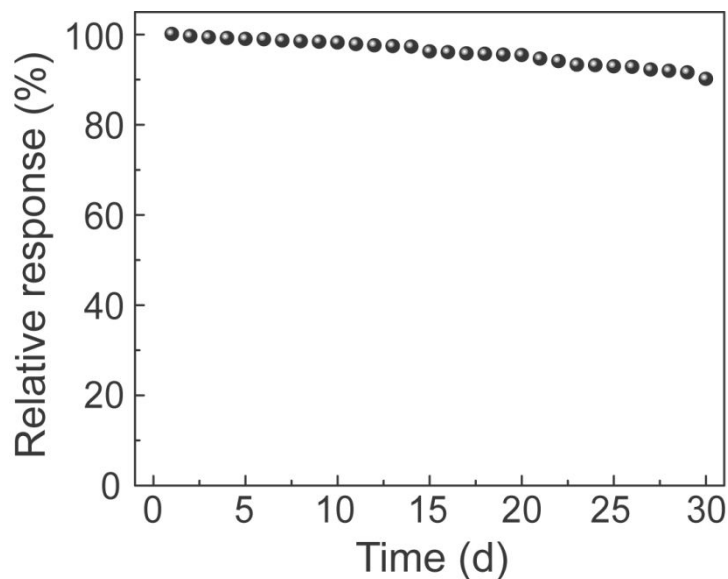

**Figure S7** Variation of the relative response current of the  $\text{VS}_2@\text{VC}@\text{NC-PdNPs/CF}$  microelectrode to 0.1 mM  $\text{H}_2\text{O}_2$  in 0.1 M PBS solution (pH 7.4) with time.

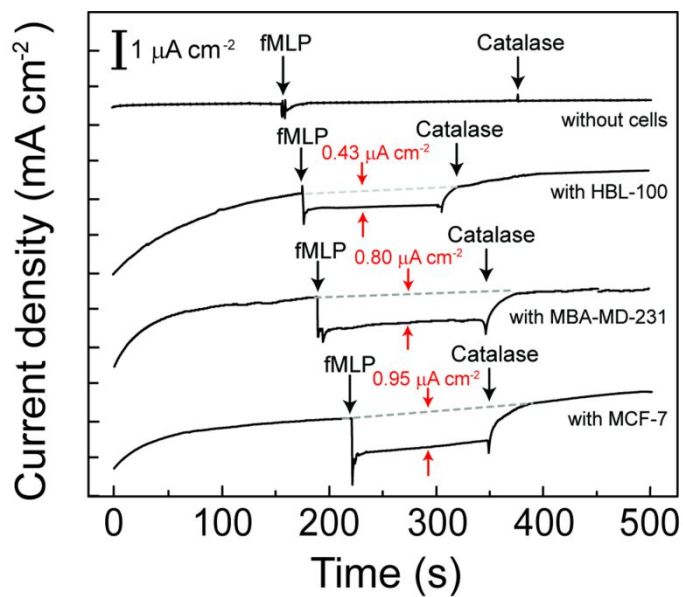

**Figure S8** Amperometric responses of  $\text{VS}_2@\text{VC}@\text{NC-PdNPs/CF}$  microelectrode to the addition of 0.05 mM fMLP and 500 U/mL catalase in tested well with MCF-7, MDA-MB-231, HBL-100 cells, and without cells.

**Table S1** The analytical performances of various nanomaterials based electrochemical sensors for detecting H<sub>2</sub>O<sub>2</sub>.

| Electrode materials                                                                                                              | Detection<br>limit (nM) | Linear<br>range (μM)  | Sensitivity<br>(μA mM <sup>-1</sup> cm <sup>-2</sup> ) | Ref.         |
|----------------------------------------------------------------------------------------------------------------------------------|-------------------------|-----------------------|--------------------------------------------------------|--------------|
| VS <sub>2</sub> @VC@NC-PdNPs/CF                                                                                                  | 50                      | 0.1~17.684            | 152.7                                                  | This<br>work |
| MNPs@anionicMOFs/ERGO                                                                                                            | 180                     | 4~11000               | 80.23                                                  | 1            |
| Ultrathin concave Ag nanosheets                                                                                                  | 170                     | 5-6000                | 320.3                                                  | 2            |
| Gold nanoparticles decorated<br>MnO <sub>2</sub> /graphene-carbon nanotubes                                                      | 100                     | 0.4~626.8<br>686~1226 | 452                                                    | 3            |
| Ni foam-supported ZnO nanowires and<br>Co <sub>3</sub> O <sub>4</sub> /NiCo <sub>2</sub> O <sub>4</sub> double-shelled nanocages | 163                     | 0.2~2400              | 388                                                    | 4            |
| Co nanoparticles embedded nitrogen-<br>doped mesoporous carbon composites                                                        | 143                     | 1~30000               | 234.913                                                | 5            |
| AuPd alloy nanoparticles decorated<br>graphene quantum dots assembly                                                             | 500                     | 1~18440               | 371                                                    | 6            |
| Tellurium nanoparticles                                                                                                          | 28400                   | 100-500               | 757                                                    | 7            |
| Silver-iron hierarchical microflowers                                                                                            | 100                     | up to 20000           | 1.35                                                   | 8            |
| Pt nanoparticles-carbon quantum<br>dots/ionic liquid functionalized graphene<br>oxide nanocomposites                             | 100                     | 1~900                 | -                                                      | 9            |
| Graphene blended with SnO <sub>2</sub> and Pd-Pt<br>nanocages                                                                    | 300                     | 1~300                 | -                                                      | 10           |
| Microporous Ni-metal organic framework<br>material-carbon paste electrode                                                        | 900                     | 4~60000               | -                                                      | 11           |
| Polyoxometalate-based metal-organic                                                                                              | 1030                    | 10~50                 | -                                                      | 12           |



|                                                                                           |       |         |   |    |
|-------------------------------------------------------------------------------------------|-------|---------|---|----|
| framework                                                                                 |       |         |   |    |
| Hollow CuO/PANI fibers                                                                    | 110   | 5~9255  | - | 13 |
| Based-stable chromium (III) dicarboxylate metal–organic framework                         | 3520  | 25~500  | - | 14 |
| Silica-MnO <sub>2</sub> hybrid films electrodeposited on the surface of planar electrodes | 15000 | 25~1000 | - | 15 |

---

## REFERENCES

1. Li, C.; Wu, R.; Zou, J.; Zhang, T.; Zhang, S.; Zhang, Z.; Hu, X.; Yan, Y.; Ling, X. MNPs@anionicMOFs/ERGO with the Size Selectivity for the Electrochemical Determination of H<sub>2</sub>O<sub>2</sub> Released from Living Cells. *Biosens. Bioelectron.* **2018**, *116*, 81–88.
2. Ma, B.; Kong, C.; Hu, X.; Liu, K.; Huang, Q.; Lv, J.; Lu, W.; Zhang, X.; Yang, Z.; Yang, S. Silver–iron Hierarchical Microflowers for Highly Efficient H<sub>2</sub>O<sub>2</sub> Nonenzymatic Amperometric Detection. *Biosens. Bioelectron.* **2018**, *106*, 29–36.
3. Li, S.J.; Zhang, J.C.; Li, J.; Yang, H.Y.; Meng, J.J.; Zhang, B. A 3D Sandwich Structured Hybrid of Gold Nanoparticles Decorated MnO<sub>2</sub>/Graphene-Carbon Nanotubes as High Performance H<sub>2</sub>O<sub>2</sub> Sensors. *Sensor. Actuat. B-Chem.* **2018**, *260*, 1–11.
4. Xue, B.; Li, K.; Gu, S.; Zhang, L.; Lu, J. Ni Foam-Supported ZnO Nanowires and Co<sub>3</sub>O<sub>4</sub>/NiCo<sub>2</sub>O<sub>4</sub> Double-Shelled Nanocages for Efficient Hydrogen Peroxide Detection. *Sensor. Actuat. B-Chem.* **2018**, *262*, 828–836.
5. Wu, Z.; Sun, L.P.; Zhou, Z.; Li, Q.; Huo, L.H.; Zhao, H. Efficient Nonenzymatic H<sub>2</sub>O<sub>2</sub> Biosensor based on ZIF-67 MOF Derived Co Nanoparticles Embedded N-doped Mesoporous Carbon Composites. *Sensor. Actuat. B-Chem.* **2018**, *276*, 142–149.
6. Xu, Q.; Yuan, H.; Dong, X.; Zhang, Y.; Asif, M.; Dong, Z.; He, W.; Ren, J.; Sun, Y.; Xiao, F. Dual Nanoenzyme Modified Microelectrode Based on Carbon Fiber Coated with AuPd Alloy Nanoparticles

Decorated Graphene Quantum Dots Assembly for Electrochemical Detection in Clinic Cancer Samples.

*Biosens. Bioelectron.* **2018**, *107*, 153–162.

7. Waldiya, M.; Bhagat, D.; Narasimman, R.; Singh, S.; Kumar, A.; Ray, A.; Mukhopadhyay, I. Development of Highly Sensitive H<sub>2</sub>O<sub>2</sub> Redox Sensor from Electrodeposited Tellurium Nanoparticles Using Ionic Liquid. *Biosens. Bioelectron.* **2019**, *132*, 319–325.

8. Sarhan, R.M.; El-Nagar, G.A.; Abouserie, A.; Roth, C. Silver–Iron Hierarchical Microflowers for Highly Efficient H<sub>2</sub>O<sub>2</sub> Nonenzymatic Amperometric Detection. *ACS Sustainable Chem. Eng.* **2019**, *7*, 4335–4342.

9. Chen, D.; Zhuang, X.; Zhai, J.; Zheng, Y.; Lu, H.; Chen, L. Preparation of Highly Sensitive Pt Nanoparticles-Carbon Quantum Dots/Ionic Liquid Functionalized Graphene Oxide Nanocomposites and Application for H<sub>2</sub>O<sub>2</sub> Detection. *Sensor. Actuat. B-Chem.* **2018**, *255*, 1500–1506.

10. Fu, Y.; Huang, D.; Li, C.; Zou, L.; Ye, B. Graphene Blended with SnO<sub>2</sub> and Pd-Pt Nanocages for Sensitive Non-Enzymatic Electrochemical Detection of H<sub>2</sub>O<sub>2</sub> Released from Living Cells. *Anal. Chim. Acta* **2018**, *1014*, 10–18.

11. Sherino, B.; Mohamad, S.; Halim, S.N.A.; Manan, N.S.A. Electrochemical Detection of Hydrogen Peroxide on a New Microporous Ni-Metal Organic Framework Material-Carbon Paste Electrode. *Sensor. Actuat. B-Chem.* **2018**, *254*, 1148–1156.

12. Wang, C.; Zhou, M.; Ma, Y.; Tan, H.; Wang, Y.; Li, Y. Hybridized Polyoxometalate-based Metal–Organic Framework with Ketjenblack for the Nonenzymatic Detection of H<sub>2</sub>O<sub>2</sub>. *Chem. Asian J.* **2018**, *13*, 2054–2059.

13. Liu, T.; Guo, Y.; Zhang, Z.; Miao, Z.; Zhang, X.; Su, Z. Fabrication of Hollow CuO/PANI Hybrid Nanofibers for Non-enzymatic Electrochemical Detection of H<sub>2</sub>O<sub>2</sub> and Glucose. *Sensor. Actuat. B-Chem.* **2019**, *286*, 370–376.

14. Lopa, N. S.; Rahman, M. M.; Ahmed, F.; Sutradhar, S. C.; Ryu, T.; Kim, W. A Base-stable Metal–Organic Framework for Sensitive and Nonenzymatic Electrochemical Detection of Hydrogen Peroxide. *Electrochim. Acta* **2018**, *274*, 49–56.

15. Kovalyk, A.; Tananaik, O.; Borets, A.; Etienne, M.; Walcarius, A. Voltammetric and Microscopic Characteristics of MnO<sub>2</sub> and silica-MnO<sub>2</sub> Hybrid Films Electrodeposited on the Surface of Planar Electrodes. *Electrochim. Acta* **2019**, *306*, 680–687.

**Table S2** Influence of foreign species on the determination of 0.1 mM H<sub>2</sub>O<sub>2</sub> in 0.10 M PBS solution containing 0.5 mM interferents by VS<sub>2</sub>@VC@NC-PdNPs/CF microelectrode.

| foreign species               | Change of current response (%) | RSD (%) ( <i>n</i> =6) |
|-------------------------------|--------------------------------|------------------------|
| glycine                       | 3.6                            | 3.5                    |
| leucine                       | -3.9                           | 2.6                    |
| valine                        | 2.5                            | 4.3                    |
| tryptophan                    | 4.6                            | 3.6                    |
| phosphotyrosine               | -2.7                           | 1.7                    |
| glutamine                     | -3.2                           | 4.2                    |
| cysteine                      | 3.8                            | 2.5                    |
| adenine                       | -5.0                           | 3.8                    |
| guanine                       | 4.2                            | 2.9                    |
| xanthine                      | 3.4                            | 3.1                    |
| hypoxanthine                  | 2.7                            | 3.8                    |
| glucose                       | -3.2                           | 2.5                    |
| fructose                      | 4.4                            | 4.0                    |
| Na <sup>+</sup>               | -3.8                           | 3.7                    |
| K <sup>+</sup>                | 1.7                            | 4.4                    |
| Ca <sup>2+</sup>              | 2.4                            | 3.5                    |
| Mg <sup>2+</sup>              | 3.2                            | 2.0                    |
| Al <sup>3+</sup>              | -2.8                           | 4.8                    |
| Zn <sup>2+</sup>              | 4.2                            | 3.5                    |
| CO <sub>3</sub> <sup>2-</sup> | 3.6                            | 3.4                    |
| SO <sub>4</sub> <sup>2-</sup> | -2.1                           | 3.0                    |
| PO <sub>4</sub> <sup>3-</sup> | -4.5                           | 2.2                    |
| Cl <sup>-</sup>               | 3.5                            | 4.5                    |
